# Supplementary material for: Comparative Analysis of Transcriptional Profiles of Adult Schistosoma japonicum from Different Laboratory Animals and the Natural Host, Water Buffalo
Source: PLoS Negl Trop Dis. 2015 Aug 18;9(8):e0003993. doi: 10.1371/journal.pntd.0003993 (PMC4540470; doi:10.1371/journal.pntd.0003993)
Supplement: S4 Table — (XLSX) [file pntd.0003993.s004.xlsx]

## Sheet: Sheet1
	S4 Table. The gene expression values extracted from our microarray database for genes which were differentially expressed in schistosomes from water buffalo, yellow cattle and goats [7,8].
	Accession	Porbe set ID	Gene and/or protein homology	BALB/c_P1	BALB/c_P2	BALB/c_P3	C57BL/6_P1	C57BL/6_P2	C57BL/6_P3	Buffalo_P1	Buffalo_P2	Buffalo_P3	Rabbit_P1	Rabbit_P2	Rabbit_P3	BALB/c_P Mean	C57BL/6_P Mean	Buffalo_P Mean	Rabbit_P Mean
	CNUS0000102460	Sja_S53123686	hypothetical protein	51915.1	32157	50930.5	54520.6	31056.8	48612.4	31543.4	31865.1	32046.7	32694.4	32691.4	30893.5	45000.9	44729.9	31818.4	32093.1
	CNUS0000099597	CNUS0000099597.1	heat shock 70 kDa protein cognate 4	27639.5	25771.8	26639.7	24532.4	22269.8	24546.8	27338.4	26574.5	27071.3	25846.1	25512	27206.5	26683.7	23783	26994.7	26188.2
	CNUS0000100348	CNUS0000100348.1	small subunit ribosomal protein S27Ae	21068	20934.7	20222.1	19930.4	21605.4	21190.6	22420.6	20794	21022.5	19694.8	20919	19993.1	20741.6	20908.8	21412.4	20202.3
	CNUS0000106958	Sja_S53113527	hypothetical protein	16388.7	18317.7	16895.2	13886.7	13160.9	14019.4	18804.7	15243.8	17521.5	14900.8	12281.5	13567.6	17200.5	13689	17190	13583.3
	CNUS0000097704	CNUS0000097704.1	SJCHGC06649 protein	14702.1	14431	14928.9	13101.7	14155.6	13988.6	14818.8	14990.4	14751.2	15330.6	12080.7	14446.4	14687.3	13748.6	14853.5	13952.6
	CNUS0000105370	PG014628	hypothetical protein	11072.4	12582.7	11778.7	9715.29	8128.62	9744.23	13907.2	10386.9	11841.7	9964.9	7464.34	8702.17	11811.3	9196.05	12045.3	8710.47
	CNUS0000100666	PG005381	SJCHGC01647 protein	9560.03	10595.5	9747.28	9647.67	10361.1	9408.45	9114.23	9979.86	9795.55	9016.83	9563.09	9297.18	9967.6	9805.73	9629.88	9292.37
	CNUS0000098808	Sja_S23872271	SJCHGC02473 protein	8984.91	8194.27	8571.38	8203.44	7597.28	8475.5	9615.31	9027.48	9578.53	9112.18	9644.64	9613.44	8583.52	8092.08	9407.11	9456.75
	CNUS0000101434	CNUS0000101434.1	39S ribosomal protein L35	8022.36	8459.88	8552.38	8028.46	8070.7	8085.37	8540.28	9057.04	8665.92	8323.75	7732.62	7714.93	8344.87	8061.51	8754.41	7923.77
	CNUS0000096077	Sja_S53128716	eukaryotic translation initiation factor 3 subunit 12	8006.13	8376.59	8238.75	8273.92	8409.76	7810.04	7653.37	8166.98	7853.78	7646.88	8284.22	7724.68	8207.16	8164.57	7891.38	7885.26
*	FN313838	Sja_S53129052	hypothetical protein	7999.79	7790.31	7682.6	8672.63	7046.02	7759.37	1391.73	2372.17	1676.49	2578.16	2372.26	2325.33	7824.23	7826.01	1813.47	2425.25
	CNUS0000097185	CNUS0000097185.1	rrp4	7887.48	8770.04	7875.5	7831.34	7272.73	7995.93	9862.16	9131.91	9684.41	8433.55	8596.16	8221.78	8177.68	7700	9559.49	8417.16
	CNUS0000103392	Sja_S53121012	transcription factor IIE	7598.73	7608.23	7172.42	7066.01	6944.24	7111.16	9214.27	8821.3	8677.27	8368.72	7912.39	7991.65	7459.79	7040.47	8904.28	8090.92
	CNUS0000097938	CNUS0000097938.1	SJCHGC04937 protein	6815.19	7354.72	7178.94	5845.37	8111.06	7158.84	6394.06	6073.17	6087.32	7158.26	7573.35	7679.97	7116.28	7038.42	6184.85	7470.53
	CNUS0000103308	Sja_S53121016	dual specificity mitogen-activated protein kinase kinase 6	6309.57	6276.88	6389.61	6261.66	5901.62	6168.23	6480.93	6474.98	6563	6322.51	6362.41	6360.54	6325.35	6110.5	6506.3	6348.49
	CNUS0000107240	Sja_S53121017	glutamic acid-rich protein precursor	6202.88	5800.33	6387.18	6248.19	6635.86	6039.48	8154.57	7254.41	7893.92	6091.79	5882.51	6013.4	6130.13	6307.84	7767.63	5995.9
	CNUS0000107215	PG004871	der1-like protein 2	6088.74	6325.26	6574.39	5981.65	6932.14	6047.82	6394.32	6699.23	6683.19	6538.27	6720.5	6626.38	6329.46	6320.53	6592.24	6628.38
	CNUS0000098991	CNUS0000098991.1	hypothetical protein	4965.17	3688.4	4392.71	4539.38	3976.11	4201.3	2688.76	3311.29	2919.75	4403.84	4064.02	4401.72	4348.76	4238.93	2973.27	4289.86
	CNUS0000106914	PG004840	hypothetical protein	4640.98	4607.7	4576.45	5765.75	5612.48	5530.51	4384.79	5104.92	4719.18	4334.82	4551.99	4404.12	4608.38	5636.25	4736.3	4430.31
	CNUS0000102986	Sja_S24186248	SJCHGC08962 protein	4595.89	5889.05	4620.88	4949.95	5688.72	5110.84	3671.12	3811.09	4028.73	5111.52	5284.03	4759.52	5035.27	5249.84	3836.98	5051.69
	CNUS0000102089	CNUS0000102089.1	nucleoside diphosphate kinase	4296.31	5963.49	4460.59	5231.1	5306.47	5244.73	4710.67	4752.72	4595.43	4986.67	5156.47	4861.56	4906.8	5260.77	4686.27	5001.57
	FN321589	Sja_S53117402	hypothetical protein	3754.47	3095.28	3744.16	4752.44	5062	4672.48	4989.74	4144.82	4614.32	3453.19	3008.81	3274.04	3531.3	4828.97	4582.96	3245.35
*	CNUS0000096235	CNUS0000096235.1	SJCHGC06727 protein	3489.33	3830.63	3925.24	5619.66	4679.94	5204.37	1895.17	2622.88	1942.44	3443.4	3145.86	2787.55	3748.4	5167.99	2153.5	3125.6
	AY809022	PG013929	SJCHGC02234 protein	3000.71	2952.83	3009.43	2679.79	2495.04	2605.19	2981.06	2682.14	2912.1	3058.17	2735.62	2794.66	2987.66	2593.34	2858.43	2862.82
*	FN318955	Sja_S53119540	hypothetical protein	2799.8	3257.93	3019.61	3837.8	3313.06	3281.79	1372.95	2123.5	1613.83	2677.29	2777.36	2535.7	3025.78	3477.55	1703.43	2663.45
	CNUS0000103785	Sja_S53122284	putative beta-arrestin	2795.52	2351.8	2702.01	2281.55	2507.41	2317.08	2674.61	2556.54	2558.96	2595.12	2817.58	2679.12	2616.44	2368.68	2596.7	2697.27
*	CNUS0000098059	CNUS0000098059.1	hypothetical protein	2545.96	3652.81	2959.48	2614.46	2316.04	2280.43	1053.88	1747.73	1398.05	2926.21	2785.59	2806.82	3052.75	2403.65	1399.89	2839.54
	CNUS0000099080	CNUS0000099080.1	hypothetical protein	2528.53	2660.84	2657.98	2873.08	2849.02	2771.37	2523.07	2749.89	2567.5	2636.29	2902.11	2828.56	2615.78	2831.16	2613.49	2788.98
	CNUS0000106580	CNUS0000106580.1	hypothetical protein	2191.59	2351.92	2285.4	2310.19	2363.02	2482.22	3154.9	2969.13	2973.1	2560.04	2413.35	2438.57	2276.3	2385.14	3032.37	2470.65
	CNUS0000104327	CNUS0000104327.1	SJCHGC08826 protein	2093.95	2918.59	2242.5	1974.86	2549.01	2138.06	2295.47	2557.99	2324.68	2578.02	2278.93	2390.35	2418.35	2220.65	2392.72	2415.77
	CNUS0000103345	CNUS0000103345.1	hypothetical protein	1991.77	2039.99	2163.43	2303.86	2163.59	2211.1	1440.95	1835.67	1618.29	1739.84	1780.01	1617.67	2065.06	2226.18	1631.63	1712.51
	FN318567	Sja_S53120552	hypothetical protein	1605.02	1339.86	1499.34	1504.67	1280.34	1491.54	2136.15	2025.86	2050.95	1958.41	1854.68	1821.06	1481.4	1425.52	2070.99	1878.05
	CNUS0000107991	CNUS0000107820.1	SJCHGC09396 protein	1467.17	1272.17	1387.53	1345.07	1274.99	1346.52	1672.52	1520.3	1626.91	1608.12	1739.03	1595.22	1375.62	1322.19	1606.57	1647.45
	CNUS0000100714	CNUS0000100714.1	pyruvate carboxylase	1442.43	1427.81	1550.02	1605.4	1522.05	1613.3	2074.57	1988.43	2042.93	2101.72	1875.92	1841.03	1473.42	1580.25	2035.31	1939.56
	CNUS0000097541	CNUS0000097541.1	zinc finger protein	1147.22	1191.98	1160.28	1233.7	1374.76	1267.67	1040.5	1104.76	1075.71	1181.97	1161.47	1189.84	1166.49	1292.04	1073.66	1177.76
	CNUS0000105097	CNUS0000105097.1	SJCHGC09538 protein	1052.66	989.988	1099.73	1226.68	1020.71	1051.65	1232.6	876.089	945.19	1000.35	784.821	939.822	1047.46	1099.68	1017.96	908.33
	CNUS0000101033	CNUS0000101032.1	hypothetical protein	991.314	1313.93	1126.19	826.185	1656.12	1091.99	1427.43	900.311	1303.97	1045.83	743.15	866.258	1143.81	1191.43	1210.57	885.079
	CNUS0000102479	CNUS0000101032.1	hypothetical protein	991.314	1313.93	1126.19	826.185	1656.12	1091.99	1427.43	900.311	1303.97	1045.83	743.15	866.258	1143.81	1191.43	1210.57	885.079
	CNUS0000101956	PG003231	hypothetical protein	880.443	775.894	823.907	778.685	850.998	794.432	797	898.852	910.642	911.721	1086.86	950.975	826.748	808.038	868.831	983.186
	CNUS0000105771	CNUS0000105771.1	hypothetical protein	767.078	777.098	727.9	801.788	1172.73	838.524	784.118	830.279	791.59	822.379	918.763	867.02	757.359	937.682	801.996	869.387
	CNUS0000097512	CNUS0000097512.1	metabotropic glutamate receptor	766.596	700.232	686.03	496.133	686.727	582.172	615.298	630.218	650.584	767.205	888.341	894.055	717.619	588.344	632.033	849.867
	FN326902	Sja_S53118430	hypothetical protein	750.712	640.466	758.82	651.111	640.477	579.541	739.39	702.393	641.026	726.717	868.121	846.353	716.666	623.71	694.27	813.73
	CNUS0000101740	CNUS0000101740.1	SJCHGC04000 protein	685.402	757.5	666.16	693.483	663.224	732.324	541.332	531.93	500.02	726.761	719.628	706.406	703.021	696.343	524.428	717.598
	CNUS0000105578	CNUS0000105578.1	hypothetical protein	637.694	599.934	590.517	702.79	665.722	641.531	770.069	700.357	617.717	584.288	637.663	558.166	609.381	670.014	696.047	593.372
*	CNUS0000102644	CNUS0000102644.1	SJCHGC07531 protein	609.593	546.995	552.59	667.755	551.513	605.305	1310.26	1206.16	1220.62	834.622	762.39	754.037	569.726	608.191	1245.68	783.683
	CNUS0000107955	CNUS0000107955.1	retrovirus-related Pol polyprotein from transposon 17.6	559.616	668.508	492.829	363.303	354.465	345.643	418.845	418.452	487.627	320.697	345.849	427.787	573.651	354.47	441.641	364.778
	CNUS0000107219	CNUS0000107219.1	serine/threonine protein kinase	515.978	441.037	463.972	569.658	450.206	508.806	335.64	452.438	367.533	422.404	465.481	453.878	473.662	509.557	385.204	447.254
	CNUS0000100029	PG006159	elongation of fatty acids protein 1	451.649	631.755	534.05	366.56	501.562	485.091	433.769	530.44	493.239	574.391	520.491	520.76	539.151	451.071	485.816	538.548
	CNUS0000100693	CNUS0000100693.1	dopamine-beta-monooxygenase	426.696	161.246	377.632	606.887	206.751	409.7	279.114	389.91	346.025	273.773	184.029	253.587	321.858	407.78	338.35	237.13
	FN317168	Sja_S53123143	hypothetical protein	419.209	417.454	401.116	341.442	615.467	415.554	278.357	417.119	319.177	392.429	397.3	425.164	412.593	457.488	338.218	404.965
*	CNUS0000105021	CNUS0000105021.1	SJCHGC03548 protein	408.165	211.432	363.098	1300.23	394.306	949.692	141.278	211.547	154.348	188.969	260.929	167.921	327.565	881.408	169.058	205.94
	CNUS0000099819	CNUS0000099819.1	eukaryotic translation initiation factor 3 subunit (eif-3)	359.085	291.256	333.915	268.979	289.32	258.056	277.475	334.998	332.473	378.993	353.135	340.13	328.085	272.119	314.982	357.42
	CNUS0000097970	CNUS0000097970.1	protein kinase	352.051	377.155	322.58	386.683	388.776	356.075	278.314	316.278	310.178	348.858	365.423	329.934	350.595	377.178	301.59	348.072
	CNUS0000104814	CNUS0000104814.1	serine/threonine protein kinase	309.514	380.73	323.951	328.328	284.351	366.359	421.779	380.327	377.888	380.427	373.852	360.262	338.065	326.346	393.331	371.514
	CNUS0000105941	CNUS0000105941.1	serine/threonine-protein kinase	294.523	305.76	303.702	272.661	209.794	223.29	320.997	334.194	313.074	377.11	386.584	361.721	301.328	235.248	322.755	375.138
	CNUS0000096900	CNUS0000105756.1	similar to germinal histone H4 gene	266.08	259.7	265.163	143.739	214.914	181.031	391.938	318.333	331.709	275.119	270.61	340.724	263.648	179.895	347.327	295.484
	CNUS0000105756	CNUS0000105756.1	similar to germinal histone H4 gene	266.08	259.7	265.163	143.739	214.914	181.031	391.938	318.333	331.709	275.119	270.61	340.724	263.648	179.895	347.327	295.484
*	CNUS0000098985	CNUS0000098985.1	hypothetical protein	230.486	316.458	276.922	207.432	223.437	229.215	448.088	473.724	455.145	232.673	278.842	247.139	274.622	220.028	458.986	252.884
*	CNUS0000100508	CNUS0000100508.1	aromatic-L-amino-acid decarboxylase; phenylalanine decarboxylase	216.86	101.38	156.82	440.074	73.3053	248.673	106.826	366.389	270.96	75.1286	67.1596	67.7249	158.353	254.017	248.059	70.0044
	CNUS0000105248	CNUS0000105248.1	glycosyltransferase 14 family member	196.591	157.734	169.516	101.225	226.495	186.471	132.73	117.377	120.733	136.796	169.405	145.338	174.614	171.397	123.613	150.513
*	FN320911	Sja_S53127745	hypothetical protein	183.273	56.3676	111.864	42.434	74.8267	47.1923	202.983	205.161	139.205	186.393	147.312	130.608	117.168	54.8176	182.45	154.771
	CNUS0000103473	CNUS0000103473.1	hypothetical protein	174.978	204.608	195.234	139.627	134.679	139.738	143.76	175.052	151.202	199.665	196.655	205.741	191.607	138.015	156.671	200.687
	CNUS0000096387	CNUS0000096387.1	rab3 interacting molecule (rim)-related	165.954	167.156	235.838	177.136	198.543	159.966	133.866	156.115	126.231	155.654	193.268	167.785	189.649	178.548	138.737	172.236
*	CNUS0000100610	CNUS0000100610.1	hypothetical protein	163.683	208.094	214.215	54.3503	165.153	98.8719	22.1799	47.6731	22.2462	76.1772	108.78	115.243	195.331	106.125	30.6997	100.067
	CNUS0000104147	Sja_S53122904	nucleoside-diphosphate kinase	162.846	190.533	183.602	214.358	208.238	176.969	241.698	262.12	216.503	205.768	212.692	231.94	178.994	199.855	240.107	216.8
	CNUS0000102763	PG002172	cell polarity protein; leucine-rich repeat protein; scribble complex protein	144.558	184.462	171.358	121.813	131.583	118.446	170.941	198.473	185.496	173.628	192.996	181.402	166.793	123.947	184.97	182.675
	FN317134	Sja_S53123177	placenta-specific gene 8 protein	143.516	121.868	112.445	111.285	129.952	119.882	197.212	183.085	199.951	191.994	193.269	189.357	125.943	120.373	193.416	191.54
*	CNUS0000097152	CNUS0000097152.1	cd63 antigen-like	135.418	35.233	78.3847	30.8471	19.6822	29.0095	79.6409	148.993	119.664	29.1754	52.6784	53.391	83.0118	26.5129	116.099	45.0816
	CNUS0000098407	CNUS0000098407.1	serine/threonine protein kinase	124.3	149.574	147.3	102.01	84.7096	100.882	156.866	119.69	127.537	147.202	158.6	155.026	140.391	95.8673	134.698	153.609
	CNUS0000104840	CNUS0000104840.1	phosphatidylinositol-45-bisphosphate 3-kinase catalytic subunit alpha PI3K	122.906	133.713	135.485	92.5357	113.616	101.512	81.3383	130.537	103.977	113.375	152.14	125.964	130.701	102.555	105.284	130.493
	CNUS0000107188	CNUS0000107188.1	ankyrin 23/unc44	114.384	124.582	105.357	161.896	138.06	148.91	87.2982	105.792	108.095	62.2517	88.9118	106.873	114.774	149.622	100.395	86.0123
	CNUS0000107560	PG013390	hypothetical protein	104.43	91.6416	98.8183	104.353	105.032	82.2112	89.3131	91.5998	131.255	110.803	167.33	98.59	98.2965	97.1988	104.056	125.574
	CNUS0000105782	CNUS0000105782.1	ectopic virus integration site	91.3192	105.033	93.9713	97.2317	103.379	107.317	142.335	133.054	128.767	123.762	99.5563	93.9103	96.7743	102.643	134.719	105.743
	CNUS0000099115	CNUS0000099115.1	sodium/chloride dependent neurotransmitter transporter	79.9844	35.5297	66.2944	59.2572	25.1525	46.1658	42.8623	29.8676	45.4736	22.0007	28.4087	27.8041	60.6028	43.5251	39.4012	26.0712
	CNUS0000102024	PG003161	family S9 non-peptidase homologue (S09 family)	69.8178	72.8219	67.9567	65.3363	62.1726	54.4674	39.9056	49.8864	44.3022	57.7922	87.4708	55.8335	70.1988	60.6588	44.6981	67.0322
	CNUS0000102718	CNUS0000102718.1	pumilio	67.8481	88.0829	88.5663	43.7661	45.811	46.858	42.0573	50.1102	52.9973	56.8259	52.4446	71.1279	81.4991	45.4784	48.3882	60.1328
	CNUS0000097260	CNUS0000097260.1	lim homeobox protein	67.1827	57.9022	82.1341	64.0576	57.1945	80.6376	37.0324	49.7801	45.2537	57.3971	51.2107	93.3363	69.073	67.2966	44.0221	67.3147
	CNUS0000107391	CNUS0000107391.1	phosphatidylinositol 4-kinase	66.5182	98.3591	88.7964	60.0776	78.1508	71.6698	68.3334	51.4511	52.2493	59.3846	65.2412	49.5576	84.5579	69.9661	57.3446	58.0611
	CNUS0000104355	CNUS0000104355.1	cadherin	47.4987	63.7643	40.7288	45.9432	31.1726	32.8676	49.371	45.4772	47.4503	71.8029	61.5999	49.9821	50.6639	36.6611	47.4328	61.1283
	CNUS0000096114	CNUS0000096114.1	hypothetical protein	45.376	31.7835	24.4521	28.6992	29.9035	30.956	26.3283	23.868	40.0291	30.2553	36.2663	34.4172	33.8706	29.8529	30.0751	33.6463
	CNUS0000106588	CNUS0000106588.1	hypothetical protein	35.385	38.3694	19.408	48.6952	126.283	79.4541	18.2264	34.3873	24.3467	21.8919	13.8183	13.953	31.0542	84.8107	25.6535	16.5544
	CNUS0000102860	CNUS0000102860.1	hypothetical protein	34.0594	22.2688	26.5099	28.1232	31.2906	15.0679	22.2175	37.0037	24.4663	47.373	42.9712	44.9918	27.6127	24.8273	27.8958	45.112
	CNUS0000098396	CNUS0000098396.1	iroquois homeobox family transcription factor	32.0753	49.0605	32.4742	36.0999	47.1765	34.9757	28.1856	33.3801	33.5262	40.4469	48.6418	36.0055	37.87	39.4173	31.6973	41.6981
	CNUS0000104279	CNUS0000104279.1	SJCHGC06302 protein	30.1204	64.2456	53.9729	33.5314	51.0025	26.935	38.6551	49.4794	43.9439	51.8124	29.9128	39.614	49.4463	37.1563	44.0262	40.4464
	CNUS0000102970	CNUS0000102970.1	sap-97	25.4571	27.4433	24.8483	26.1971	26.0347	25.9198	18.9366	35.2127	15.127	26.0943	17.4987	25.7187	25.9163	26.0505	23.0921	23.1039
	CNUS0000107266	CNUS0000107266.1	hypothetical protein	24.1471	20.8065	22.8117	38.795	23.1566	27.9907	19.3443	24.5791	35.4545	18.7636	25.9312	21.8676	22.5884	29.9808	26.4593	22.1875
	CNUS0000106060	CNUS0000106060.1	homeobox protein distal-less dlx	23.3306	45.4928	32.1549	42.6211	41.2383	44.532	32.962	40.6804	42.0136	36.7522	43.7163	44.0284	33.6594	42.7971	38.552	41.499
	CNUS0000101576	CNUS0000101576.1	hypothetical protein	21.4352	23.4421	24.5152	18.1582	14.1632	48.572	19.3407	21.7795	23.2501	46.373	14.6433	19.8874	23.1308	26.9645	21.4568	26.9679
	CNUS0000104648	CNUS0000104648.1	asparagine-rich protein	21.4219	23.3979	24.5651	26.7272	18.0043	21.4916	20.3807	20.1167	30.6407	18.5709	19.5878	21.4941	23.1283	22.0744	23.7127	19.8843
	FN326855	Sja_S53118079	hypothetical protein	21.2685	18.609	24.9105	27.5082	38.609	25.2069	33.0556	22.9034	30.5026	41.7479	25.8021	28.2235	21.596	30.4413	28.8205	31.9245
	CNUS0000100665	CNUS0000100665.1	hypothetical protein	17.9705	14.2989	17.8477	13.5954	15.0626	17.8122	12.3497	19.7728	26.1211	19.4412	19.5798	25.551	16.7057	15.4901	19.4145	21.524
	CNUS0000103668	CNUS0000103668.1	alpha-mannoside beta-16-n-acetylglucosaminyltransferase	17.3127	27.5508	20.8117	21.8852	47.6638	31.9871	28.6505	18.5222	22.7294	14.2298	17.6824	22.0254	21.8917	33.8454	23.3007	17.9792
	CNUS0000099781	CNUS0000099781.1	dishevelled	14.1896	16.451	15.7931	12.8307	13.2147	18.9209	15.0037	13.4039	16.4371	13.4521	14.2778	14.2323	15.4779	14.9888	14.9482	13.9874
	CNUS0000101679	CNUS0000101679.1	SJCHGC02192 protein	12.48	23.4772	12.8791	40.3922	14.2277	20.1094	50.0046	15.2618	19.6709	15.2685	17.8839	16.4549	16.2788	24.9098	28.3124	16.5358
	CNUS0000107293	CNUS0000107293.1	SET domain-containing protein 2	12.1177	14.4027	7.4636	8.4616	9.616	32.8689	8.8926	10.3215	23.1399	13.6049	8.32015	9.05	11.328	16.9822	14.118	10.325
	CNUS0000101178	PG004215	degenerative spermatocyte homolog 1	11.7159	14.3975	9.9851	13.5439	10.9085	12.7189	16.0441	14.1361	15.9399	14.5143	13.5391	11.0161	12.0328	12.3904	15.3734	13.0232
	CNUS0000098012	CNUS0000098012.1	tyrosine kinase	9.759	8.7604	13.6249	9.43035	12.3375	9.87305	12.0945	15.5498	9.7093	9.9139	9.6938	11.414	10.7148	10.547	12.4512	10.3406
	CNUS0000098788	CNUS0000098788.1	SJCHGC06163 protein	8.84665	10.2547	11.7796	10.9208	14.9411	7.74115	8.7723	8.45	9.3935	9.52435	10.3032	10.8987	10.2936	11.201	8.87193	10.2421
	FN326681	Sja_S23407569	hypothetical protein	7.5245	6.85985	13.3786	6.50585	8.0942	7.69805	7.91845	7.5596	7.99345	6.19735	7.79765	6.40505	9.25432	7.4327	7.82383	6.80002
	Note:
P	Adult worm pair from corresponding mammalian host, each sample with three biological replicates.
*	Differentially expressed genes identified by our microarray.
